# Supplementary material for: Residential flood loss estimated from Bayesian multilevel models
Source: Copernicus journal article supplement (doi:10.5194/nhess-21-1599-2021), 2021-05-26
Supplement: Supplementary file 1 [file nhess-21-1599-2021-supplement.pdf]

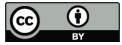

*Supplement of*

## **Residential flood loss estimated from Bayesian multilevel models**

**Guilherme S. Mohor et al.**

*Correspondence to:* Guilherme S. Mohor ([samprognamoh@uni-potsdam.de](mailto:samprognamoh@uni-potsdam.de))

The copyright of individual parts of the supplement might differ from the article licence.

Table S1. Comparison of candidate models of each variants by their difference in the expected log pointwise predictive density (elpd) to first model (fit1) and the standard error of the differences; model candidates with cumulative predictors from 1 to 12

| Single-level |          |           |         | Flood Type |          |           |         | Region |          |           |         | Event  |          |           |         | Predictors                                   |
|--------------|----------|-----------|---------|------------|----------|-----------|---------|--------|----------|-----------|---------|--------|----------|-----------|---------|----------------------------------------------|
| Model        | elpd_loo | elpd_diff | se_diff | Model      | elpd_loo | elpd_diff | se_diff | Model  | elpd_loo | elpd_diff | se_diff | Model  | elpd_loo | elpd_diff | se_diff |                                              |
| fit1         | 1986.4   | 0         | 0       | fit1       | 2018.68  | 0         | 0       | fit1   | 2002.60  | 0         | 0       | fit1   | 2036.28  | 0         | 0       | WD                                           |
| fit2         | 2033.8   | 47.34     | 9.56    | fit2       | 2057.33  | 38.65     | 8.72    | fit2   | 2041.76  | 39.16     | 8.60    | fit2   | 2074.17  | 37.89     | 8.55    | WD+BA                                        |
| fit3         | 2079.6   | 93.15     | 13.88   | fit3       | 2093.22  | 74.54     | 12.45   | fit3   | 2085.28  | 82.67     | 13.14   | fit3   | 2109.95  | 73.67     | 13.26   | WD+BA+Con                                    |
| fit4         | 2092.3   | 105.81    | 15.3    | fit4       | 2098.06  | 79.37     | 12.84   | fit4   | 2094.31  | 91.71     | 14.49   | fit4   | 2122.40  | 86.13     | 14.51   | WD+BA+Con+Dur                                |
| fit5         | 2109.8   | 123.33    | 16.11   | fit5       | 2113.37  | 94.69     | 13.62   | fit5   | 2107.96  | 105.36    | 15.14   | fit5   | 2126.39  | 90.11     | 14.95   | WD+BA+Con+Dur+Pre                            |
| fit6         | 2118.1   | 131.61    | 16.41   | fit6       | 2124.02  | 105.34    | 14.10   | fit6   | 2111.94  | 109.33    | 15.50   | fit6   | 2130.38  | 94.11     | 15.46   | WD+BA+Con+Dur+Pre+Ins                        |
| fit7         | 2122.9   | 136.47    | 16.68   | fit7*      | 2127.00  | 108.32    | 14.50   | fit7   | 2115.93  | 113.32    | 15.68   | fit7*  | 2132.51  | 96.23     | 15.72   | WD+BA+Con+Dur+Pre+Ins+Eff                    |
| fit8*        | 2122.0   | 135.54    | 16.65   | fit8*      | 2125.44  | 106.76    | 14.53   | fit8*  | 2115.38  | 112.78    | 15.66   | fit8*  | 2130.47  | 94.19     | 15.69   | WD+BA+Con+Dur+Pre+Ins+Eff+Eme                |
| fit9*        | 2124.0   | 137.5     | 16.93   | fit9*      | 2126.19  | 107.51    | 14.82   | fit9*  | 2117.35  | 114.75    | 16.19   | fit9*  | 2132.64  | 96.36     | 15.43   | WD+BA+Con+Dur+Pre+Ins+Eff+Eme+Cel            |
| fit10*       | 2125.1   | 138.69    | 16.88   | fit10*     | 2125.88  | 107.20    | 14.78   | fit10* | 2120.50  | 117.90    | 16.25   | fit10* | 2133.34  | 97.06     | 15.64   | WD+BA+Con+Dur+Pre+Ins+Eff+Eme+Cel+Vel        |
| fit11        | 2130.5   | 144.02    | 16.91   | fit11      | 2131.83  | 113.15    | 15.11   | fit11* | 2122.01  | 119.40    | 16.23   | fit11* | 2133.62  | 97.34     | 15.61   | WD+BA+Con+Dur+Pre+Ins+Eff+Eme+Cel+Vel+Exp    |
| fit12        | 2134.6   | 148.14    | 16.99   | fit12*     | 2134.26  | 115.58    | 15.26   | fit12* | 2125.23  | 122.62    | 16.26   | fit12* | 2134.36  | 98.08     | 15.72   | WD+BA+Con+Dur+Pre+Ins+Eff+Eme+Cel+Vel+Exp+BQ |

\* model complexity after which little gain is observed (elpd\_diff <4)

Table S2. Comparison of candidate models of each variants by their difference in the expected log pointwise predictive density (elpd) to the reference model fit6 (by each model variant) and the standard error of the differences; model candidates with predictors 1 to 6 plus one of the remaining predictors

| Single-level |          |           |         | Flood Type |          |           |         | Region  |          |           |         | Event   |          |           |         | Predictors<br>(for Event model variant) |
|--------------|----------|-----------|---------|------------|----------|-----------|---------|---------|----------|-----------|---------|---------|----------|-----------|---------|-----------------------------------------|
| Model        | elpd_loo | elpd_diff | se_diff | Model      | elpd_loo | elpd_diff | se_diff | Model   | elpd_loo | elpd_diff | se_diff | Model   | elpd_loo | elpd_diff | se_diff |                                         |
| fit6+8       | 2117.3   | -0.8      | 0.2     | fit6+8     | 2122.3   | -1.7      | 0.5     | fit6+8  | 2111.7   | -0.3      | 1.1     | fit6+8  | 2129.0   | -1.4      | 0.4     | WD+BA+Con+Dur+Pre+Ins+Eme               |
| fit6         | 2118.1   | 0         | 0       | fit6+10    | 2123.2   | -0.9      | 1.4     | fit6    | 2111.9   | 0         | 0       | fit6+11 | 2130.0   | -0.3      | 1.7     | WD+BA+Con+Dur+Pre+Ins+Exp               |
| fit6+10      | 2118.9   | 0.8       | 2.1     | fit6       | 2124.0   | 0         | 0       | fit6+12 | 2113.2   | 1.2       | 2.4     | fit6    | 2130.4   | 0         | 0       | WD+BA+Con+Dur+Pre+Ins                   |
| fit6+9       | 2119.9   | 1.9       | 2.6     | fit6+12    | 2124.2   | 0.2       | 2.0     | fit6+9  | 2114.7   | 2.7       | 3.3     | fit6+10 | 2131.1   | 0.7       | 2.1     | WD+BA+Con+Dur+Pre+Ins+Vel               |
| fit6+12      | 2121.3   | 3.3       | 2.9     | fit6+9     | 2124.4   | 0.3       | 2.0     | fit6+11 | 2115.0   | 3.1       | 2.8     | fit6+12 | 2131.2   | 0.8       | 2.1     | WD+BA+Con+Dur+Pre+Ins+BQ                |
| fit6+7 *     | 2122.9   | 4.9       | 3.6     | fit6+7     | 2127.0   | 3.0       | 3.5     | fit6+10 | 2115.6   | 3.6       | 3.2     | fit6+9  | 2132.1   | 1.7       | 3.0     | WD+BA+Con+Dur+Pre+Ins+Cel               |
| fit6+11*     | 2123.0   | 5.0       | 3.3     | fit6+11*   | 2130.8   | 6.7       | 3.9     | fit6+7* | 2115.9   | 4.0       | 3.4     | fit6+7  | 2132.5   | 2.1       | 3.0     | WD+BA+Con+Dur+Pre+Ins+Eff               |

\* model with relevant improvement compared to others (elpd\_diff > 4 and elpd\_diff > se\_diff)

Table S3. Comparison of candidate models of each variants by their difference in the expected log pointwise predictive density (elpd) to the reference model (fit6) and the standard error of the differences; model candidates with predictors 1 to 5 plus a combination of predictors 6, 7, and 11

| Single-Level |           |         |          | Flood Type |           |         |          | Region     |           |         |          | Event      |           |         |          | Predictor<br>(for Event variant) |
|--------------|-----------|---------|----------|------------|-----------|---------|----------|------------|-----------|---------|----------|------------|-----------|---------|----------|----------------------------------|
| Model        | elpd_diff | se_diff | elpd_loo | Model      | elpd_diff | se_diff | elpd_loo | Model      | elpd_diff | se_diff | elpd_loo | Model      | elpd_diff | se_diff | elpd_loo |                                  |
| fit5+7*      | -3.6      | 5.7     | 2114.5   | fit5+7     | -6.2      | 6.1     | 2117.8   | fit5+11*   | -0.9      | 4.2     | 2111.0   | fit5+11    | -4.3      | 4.0     | 2126.1   | WD+BA+Con+Dur+Pre+Exp            |
| fit5+11*     | -3.1      | 5.5     | 2115.0   | fit5+11*   | -3.5      | 6.4     | 2120.5   | fit5+7*    | -0.2      | 4.7     | 2111.7   | fit5+7*    | -2.3      | 4.6     | 2128.1   | WD+BA+Con+Dur+Pre+Eff            |
| fit6*        | 0         | 0       | 2118.1   | fit6*      | 0         | 0       | 2124.0   | fit6*      | 0         | 0       | 2111.9   | fit5+7+11* | -1.4      | 5.0     | 2129.0   | WD+BA+Con+Dur+Pre+Eff+Exp        |
| fit5+7+11*   | 1.6       | 6.7     | 2119.7   | fit5+7+11* | 0.1       | 7.4     | 2124.1   | fit5+7+11* | 2.3       | 5.5     | 2114.2   | fit6+11*   | -0.3      | 1.7     | 2130.0   | WD+BA+Con+Dur+Pre+Ins+Exp        |
| fit6+7       | 4.9       | 3.5     | 2122.9   | fit6+7*    | 3.0       | 3.5     | 2127.0   | fit6+11*   | 3.1       | 2.8     | 2115.0   | fit6*      | 0         | 0       | 2130.4   | WD+BA+Con+Dur+Pre+Ins            |
| fit6+11      | 5.0       | 3.3     | 2123.0   | fit6+11    | 6.7       | 3.9     | 2130.8   | fit6+7     | 4.0       | 3.4     | 2115.9   | fit6+7+11* | 1.5       | 3.5     | 2131.9   | WD+BA+Con+Dur+Pre+Ins+Eff+Exp    |
| fit6+7+11    | 9.6       | 4.8     | 2127.6   | fit6+7+11  | 9.6       | 5.4     | 2133.6   | fit6+7+11  | 6.4       | 4.3     | 2118.3   | fit6+7*    | 2.1       | 3.0     | 2132.5   | WD+BA+Con+Dur+Pre+Ins+Eff        |

\*models with predictive accuracy that is indistinguishable from that of the reference model fit6

Table S4. Central values of each variable per event grouped by similarity after post hoc tests with a significance of 0.05 (central value is the average of numeric Variables, the mode of nominal variables)

| <b>EVENT</b>         | <b>2002</b> |   | <b>2005</b> |     | <b>2006</b> |     | <b>2010</b> |   | <b>2011</b> |     | <b>2013</b> |   |
|----------------------|-------------|---|-------------|-----|-------------|-----|-------------|---|-------------|-----|-------------|---|
| <b>n</b>             | 1697        |   | 305         |     | 156         |     | 440         |   | 218         |     | 1652        |   |
| <b>Water depth</b>   | 64.212      | a | -19.351     | b   | 18.816      | b,c | 24.669      | c | -23.271     | b,c | 53.526      | d |
| <b>Duration</b>      | 142.89      | a | 52.371      | b   | 146.18      | c   | 57.962      | b | 101.21      | a   | 206.04      | d |
| <b>Velocity</b>      | 32.326      | a | 29.304      | a,b | 26.533      | b,c | 33.535      | a | 23.876      | b,c | 24.833      | c |
| <b>Contamination</b> | 0.67265     | a | 0.27        | b   | 0.35099     | b,c | 0.54801     | d | 0.25463     | b,c | 0.45702     | c |
| <b>Loss ratio</b>    | 0.12262     | a | 0.040601    | b   | 0.069922    | b,c | 0.077278    | c | 0.019505    | d   | 0.11732     | a |

(a–d) Notation of subsamples that are statistically similar to each other; same letters mean similar subsamples; two letters next to a central value means it is similar to both letters' groups (see text for reading example).
